# Supplementary material
Source: HighWire-hosted journal article supplement (https://bmjopenquality.bmj.com/content/8/3/e000539)
Supplement: inline-supplementary-material-1 [file inline-supplementary-material-1.pdf]

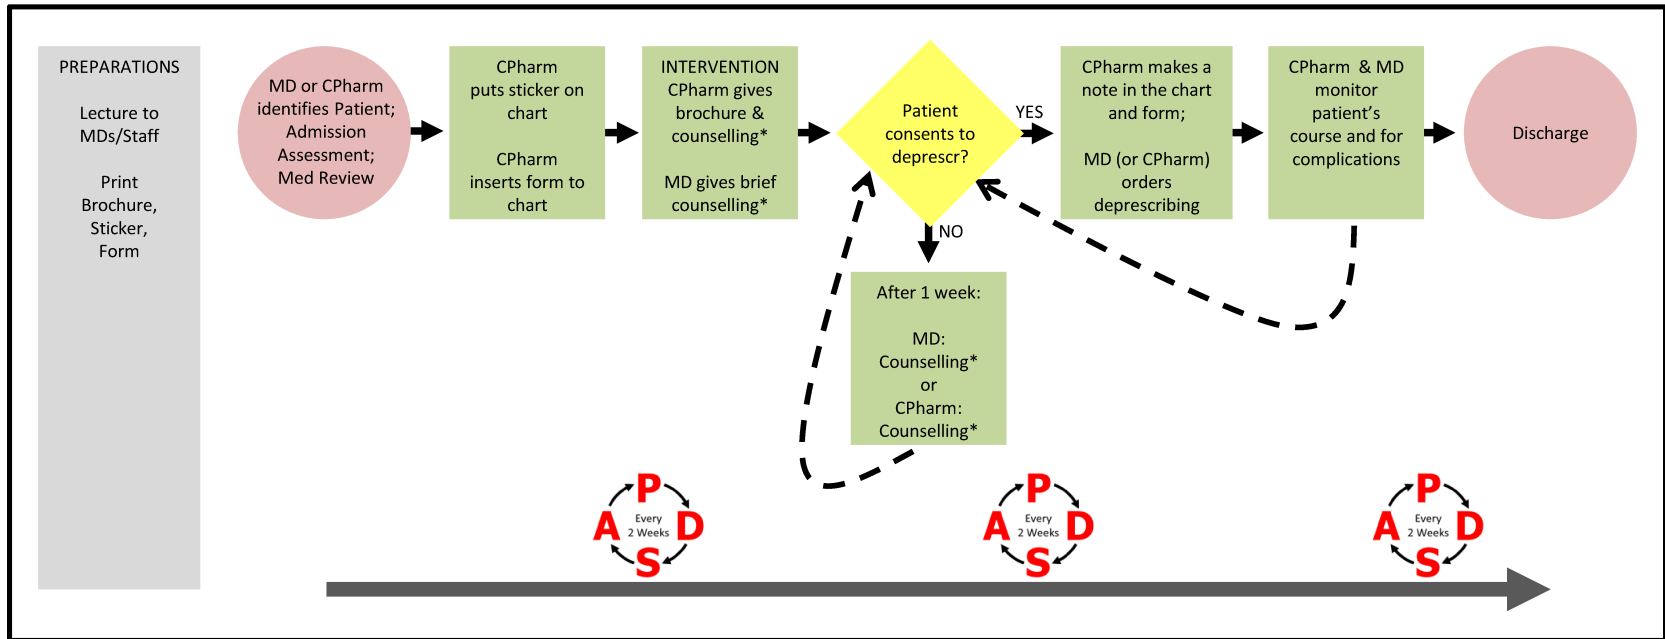

\*Counselling may consist of:

1. Discussion: Appropriate use/indication of benzodiazepines and alternatives
2. Discussion: Harms of using benzodiazepines
3. Discussion: Harms of using benzodiazepines & possible substitution; withdrawal/breakthrough symptoms; monitoring process
4. Discussion: Patient questions & concerns
5. Shared-Decision Making

**Legend:** Benzo, Benzodiazepine; CPharm, Clinical Pharmacist; Deprescr, Deprescribing; MD, Attending Physician; Med, Medication

○ Start/End    □ Process    ◇ Decision
